# Supplementary material for: Identification of blood-based key biomarker and immune infiltration in Immunoglobulin A nephropathy by comprehensive bioinformatics analysis and a cohort validation
Source: J Transl Med. 2022 Mar 29;20:145. doi: 10.1186/s12967-022-03330-w (PMC8966267; doi:10.1186/s12967-022-03330-w)
Supplement: Supplementary file 4 — Additional file 4: Supp4-eGFR and proteinuria correlated up genes. Detailed information of the eGFR and proteinuria correlated upregulated genes. [file 12967_2022_3330_MOESM4_ESM.xlsx]

## Sheet: genelist_up_GFR
Gene	Cor	Pvalue
MRPS18A	0.193	0.366
DNAJC30	NA	NA
NRIP2	0.235	0.268
CRIP1	-0.566	0.004
COL4A1	-0.675	0.0003
ADAM12	-0.296	0.16
TMSB10	-0.739	3.76e-05
TNFRSF4	0.348	0.096
SCAMP3	-0.583	0.003
TRPV2	NA	NA
COL4A2	-0.693	0.000176
TMEM160	0.101	0.639
GJD3	NA	NA
ID3	-0.123	0.566
ATXN7L2	NA	NA
DEAF1	-0.383	0.065
ZEB1	-0.212	0.321
ERG	0.285	0.176
MMRN2	0.103	0.631
AMOTL1	NA	NA
NOSIP	-0.052	0.809
EXOC3L2	NA	NA
NRP1	-0.536	0.007
KCNMB1	0.123	0.567
LGALS3BP	-0.05	0.818
TMEM186	-0.445	0.029
MRPS14	-0.287	0.174
CSRP2	0.132	0.538
SLIT3	0.389	0.06
LIMS2	0.246	0.247
CDC42BPB	-0.381	0.066
CDKN2C	0.252	0.236
SH3BP2	0.464	0.023
ICMT	-0.393	0.058
GABRE	0.021	0.921
SLFN5	NA	NA
PPCDC	0.021	0.921
CYSLTR1	NA	NA
FXYD5	-0.528	0.008
GSTM5	0.264	0.213
PGLS	-0.558	0.005
TSPO	-0.699	0.000143
ZFP90	NA	NA
RUSC1	0.072	0.739
TMEM141	NA	NA
BMP2	-0.615	0.001
EMP2	-0.029	0.892
EDF1	-0.158	0.46
KDELR2	-0.372	0.074
ORMDL2	-0.665	0.000387
ARHGEF15	0.305	0.147
TCF15	0.29	0.169
AGTR1	0.096	0.655
B3GNT7	NA	NA
CCDC85B	-0.253	0.232
TRIM2	-0.235	0.269
BOLA1	0.547	0.006
CDR2L	-0.214	0.314
CARD8	-0.297	0.158
MEF2A	-0.23	0.28
ZNF398	NA	NA
GLB1	-0.616	0.001
LYRM7	NA	NA
ZNF341	NA	NA
PEAR1	NA	NA
RASIP1	-0.109	0.613
FBN1	-0.404	0.05
DLGAP4	0.242	0.254
SLC9A3R2	0.133	0.535
FOXS1	NA	NA
PRAF2	-0.107	0.62
LFNG	-0.449	0.028
ACTR1A	-0.297	0.158
OLFML1	-0.327	0.118
NUDT16L1	NA	NA
SNTB2	0.42	0.041
GBP4	NA	NA
CXorf21	0.287	0.174
SOX18	-0.284	0.178
SATB1	-0.068	0.753
NKIRAS2	-0.224	0.293
BZW2	-0.675	0.000294
IL18BP	NA	NA
KBTBD7	NA	NA
TNFSF12	-0.018	0.932
EGFL7	0.088	0.684

## Sheet: genelist_up_PRO
Gene	Cor	Pvalue
MRPS18A	-0.492	0.024
DNAJC30	NA	NA
NRIP2	-0.064	0.781
CRIP1	0.11	0.635
COL4A1	0.499	0.021
ADAM12	-0.344	0.127
TMSB10	0.34	0.132
TNFRSF4	-0.242	0.292
SCAMP3	0.294	0.196
TRPV2	NA	NA
COL4A2	0.402	0.071
TMEM160	-0.14	0.544
GJD3	NA	NA
ID3	0.064	0.782
ATXN7L2	NA	NA
DEAF1	0.163	0.48
ZEB1	0.384	0.085
ERG	0.14	0.546
MMRN2	-0.54	0.012
AMOTL1	NA	NA
NOSIP	-0.07	0.763
EXOC3L2	NA	NA
NRP1	0.499	0.021
KCNMB1	0.129	0.577
LGALS3BP	-0.221	0.336
TMEM186	0.12	0.604
MRPS14	-0.192	0.404
CSRP2	0.399	0.073
SLIT3	-0.209	0.362
LIMS2	-0.318	0.16
CDC42BPB	-0.01	0.965
CDKN2C	-0.193	0.402
SH3BP2	-0.33	0.144
ICMT	-0.509	0.018
GABRE	0.158	0.494
SLFN5	NA	NA
PPCDC	0.183	0.427
CYSLTR1	NA	NA
FXYD5	-0.414	0.062
GSTM5	0.179	0.437
PGLS	0.409	0.065
TSPO	0.313	0.168
ZFP90	NA	NA
RUSC1	0.017	0.943
TMEM141	NA	NA
BMP2	0.427	0.054
EMP2	0.328	0.146
EDF1	0.3	0.186
KDELR2	0.595	0.004
ORMDL2	0.514	0.017
ARHGEF15	-0.529	0.014
TCF15	-0.299	0.188
AGTR1	0.126	0.585
B3GNT7	NA	NA
CCDC85B	-0.302	0.184
TRIM2	0.262	0.252
BOLA1	-0.436	0.048
CDR2L	0.097	0.677
CARD8	-0.035	0.88
MEF2A	0.432	0.051
ZNF398	NA	NA
GLB1	0.378	0.092
LYRM7	NA	NA
ZNF341	NA	NA
PEAR1	NA	NA
RASIP1	0.095	0.683
FBN1	0.296	0.193
DLGAP4	-0.389	0.081
SLC9A3R2	-0.495	0.022
FOXS1	NA	NA
PRAF2	0.37	0.099
LFNG	0.078	0.736
ACTR1A	0.386	0.084
OLFML1	0.274	0.229
NUDT16L1	NA	NA
SNTB2	-0.506	0.019
GBP4	NA	NA
CXorf21	-0.53	0.013
SOX18	0.223	0.33
SATB1	0.224	0.33
NKIRAS2	-0.417	0.06
BZW2	0.272	0.232
IL18BP	NA	NA
KBTBD7	NA	NA
TNFSF12	-0.297	0.192
EGFL7	-0.299	0.187
