# Supplementary material for: Identification of blood-based key biomarker and immune infiltration in Immunoglobulin A nephropathy by comprehensive bioinformatics analysis and a cohort validation
Source: J Transl Med. 2022 Mar 29;20:145. doi: 10.1186/s12967-022-03330-w (PMC8966267; doi:10.1186/s12967-022-03330-w)
Supplement: Supplementary file 9 — Additional file 9: Supp9-correlation map results. Detailed information of the correlation parameters from CIBERSORT results. [file 12967_2022_3330_MOESM9_ESM.xlsx]

## Sheet: 93798_cor
	B.cells.naive	B.cells.memory	Plasma.cells	T.cells.CD8	T.cells.CD4.memory.resting	T.cells.CD4.memory.activated	T.cells.follicular.helper	T.cells.regulatory..Tregs.	T.cells.gamma.delta	NK.cells.resting	NK.cells.activated	Monocytes	Macrophages.M0	Macrophages.M1	Macrophages.M2	Dendritic.cells.resting	Dendritic.cells.activated	Mast.cells.resting	Mast.cells.activated	Eosinophils	Neutrophils
B.cells.naive	1	-0.342091	-0.145333	-0.213146	0.371811	0.139493	-0.417785	0.37505	0.0461715	0.207051	-0.245652	-0.2705	0.368615	-0.152978	-0.123247	-0.336274	-0.0868805	0.44341	-0.329805	0.254754	0.354063
B.cells.memory	-0.342091	1	0.330765	0.150076	-0.0451907	-0.104832	-0.0217508	-0.159728	-0.10135	0.167454	-0.188145	-0.000681749	-0.216207	-0.228439	0.323959	0.064419	0.35749	0.180299	-0.335959	-0.102326	0.129842
Plasma.cells	-0.145333	0.330765	1	0.436808	-0.14556	-0.157866	-0.0585169	0.015527	-0.106677	-0.207285	-0.0522067	-0.135694	-0.0393463	-0.0819313	0.19005	-0.00672403	0.147617	0.163176	-0.0287997	-0.119272	-0.228812
T.cells.CD8	-0.213146	0.150076	0.436808	1	-0.36588	-0.146767	-0.0124401	-0.0182088	-0.0290237	-0.233262	0.200394	-0.103776	-0.0523945	-0.0978185	0.211569	0.412439	-0.105292	0.100763	-0.00254173	-0.160536	-0.376978
T.cells.CD4.memory.resting	0.371811	-0.0451907	-0.14556	-0.36588	1	0.011761	-0.212611	0.286597	0.123367	0.367814	-0.286647	-0.275099	-0.0298561	-0.183315	0.0288133	-0.381965	-0.144817	-0.0296688	-0.493091	0.0428613	0.442892
T.cells.CD4.memory.activated	0.139493	-0.104832	-0.157866	-0.146767	0.011761	1	0.0356958	-0.173166	-0.0495674	-0.106422	0.291294	-0.247353	-0.108143	-0.0630092	-0.324949	-0.0895929	-0.138435	-0.0983167	0.254687	-0.0500446	-0.0218521
T.cells.follicular.helper	-0.417785	-0.0217508	-0.0585169	-0.0124401	-0.212611	0.0356958	1	-0.394884	0.0575058	-0.289608	0.189815	0.0154355	-0.0215466	0.0635067	-0.111105	-0.0954447	0.0368459	-0.246393	0.410559	-0.182003	-0.125481
T.cells.regulatory..Tregs.	0.37505	-0.159728	0.015527	-0.0182088	0.286597	-0.173166	-0.394884	1	0.247338	0.0122309	-0.254689	-0.226688	0.223648	-0.0706969	0.108571	-0.0226237	-0.0918387	0.238893	-0.29434	0.215842	0.177107
T.cells.gamma.delta	0.0461715	-0.10135	-0.106677	-0.0290237	0.123367	-0.0495674	0.0575058	0.247338	1	0.0390619	-0.0888565	0.0473471	0.207733	-0.271967	-0.259264	0.00478452	-0.0541016	-0.0950515	0.0411503	-0.0483825	0.127528
NK.cells.resting	0.207051	0.167454	-0.207285	-0.233262	0.367814	-0.106422	-0.289608	0.0122309	0.0390619	1	-0.410252	0.144409	-0.051877	-0.0647111	-0.138395	-0.183258	0.205205	0.0760436	-0.485807	0.386505	0.373418
NK.cells.activated	-0.245652	-0.188145	-0.0522067	0.200394	-0.286647	0.291294	0.189815	-0.254689	-0.0888565	-0.410252	1	-0.185139	-0.413343	0.251536	-0.00588266	0.362374	-0.199252	-0.28553	0.450484	-0.139907	-0.675378
Monocytes	-0.2705	-0.000681749	-0.135694	-0.103776	-0.275099	-0.247353	0.0154355	-0.226688	0.0473471	0.144409	-0.185139	1	-0.0891638	-0.0452338	-0.218871	0.0942266	-0.0541343	-0.0132256	-0.133952	0.191736	-0.12298
Macrophages.M0	0.368615	-0.216207	-0.0393463	-0.0523945	-0.0298561	-0.108143	-0.0215466	0.223648	0.207733	-0.051877	-0.413343	-0.0891638	1	-0.0946107	-0.295332	-0.184124	-0.0770978	0.221183	0.0158088	0.150417	0.307395
Macrophages.M1	-0.152978	-0.228439	-0.0819313	-0.0978185	-0.183315	-0.0630092	0.0635067	-0.0706969	-0.271967	-0.0647111	0.251536	-0.0452338	-0.0946107	1	-0.0719709	0.0426661	-0.215947	-0.116805	0.171436	0.146522	-0.276252
Macrophages.M2	-0.123247	0.323959	0.19005	0.211569	0.0288133	-0.324949	-0.111105	0.108571	-0.259264	-0.138395	-0.00588266	-0.218871	-0.295332	-0.0719709	1	0.11794	0.0820658	0.24098	-0.351291	-0.11341	-0.138682
Dendritic.cells.resting	-0.336274	0.064419	-0.00672403	0.412439	-0.381965	-0.0895929	-0.0954447	-0.0226237	0.00478452	-0.183258	0.362374	0.0942266	-0.184124	0.0426661	0.11794	1	-0.124414	-0.0723542	0.0885031	0.0468646	-0.40299
Dendritic.cells.activated	-0.0868805	0.35749	0.147617	-0.105292	-0.144817	-0.138435	0.0368459	-0.0918387	-0.0541016	0.205205	-0.199252	-0.0541343	-0.0770978	-0.215947	0.0820658	-0.124414	1	-0.13418	-0.0204455	-0.139501	0.267362
Mast.cells.resting	0.44341	0.180299	0.163176	0.100763	-0.0296688	-0.0983167	-0.246393	0.238893	-0.0950515	0.0760436	-0.28553	-0.0132256	0.221183	-0.116805	0.24098	-0.0723542	-0.13418	1	-0.474624	0.321398	0.117212
Mast.cells.activated	-0.329805	-0.335959	-0.0287997	-0.00254173	-0.493091	0.254687	0.410559	-0.29434	0.0411503	-0.485807	0.450484	-0.133952	0.0158088	0.171436	-0.351291	0.0885031	-0.0204455	-0.474624	1	-0.234387	-0.462579
Eosinophils	0.254754	-0.102326	-0.119272	-0.160536	0.0428613	-0.0500446	-0.182003	0.215842	-0.0483825	0.386505	-0.139907	0.191736	0.150417	0.146522	-0.11341	0.0468646	-0.139501	0.321398	-0.234387	1	-0.0689294
Neutrophils	0.354063	0.129842	-0.228812	-0.376978	0.442892	-0.0218521	-0.125481	0.177107	0.127528	0.373418	-0.675378	-0.12298	0.307395	-0.276252	-0.138682	-0.40299	0.267362	0.117212	-0.462579	-0.0689294	1

## Sheet: 93798_cor_pvalue
	B.cells.naive	B.cells.memory	Plasma.cells	T.cells.CD8	T.cells.CD4.memory.resting	T.cells.CD4.memory.activated	T.cells.follicular.helper	T.cells.regulatory..Tregs.	T.cells.gamma.delta	NK.cells.resting	NK.cells.activated	Monocytes	Macrophages.M0	Macrophages.M1	Macrophages.M2	Dendritic.cells.resting	Dendritic.cells.activated	Mast.cells.resting	Mast.cells.activated	Eosinophils	Neutrophils
B.cells.naive	0	0.0265905	0.358446	0.175324	0.0153285	0.37829	0.00590513	0.0143922	0.771548	0.188288	0.116858	0.0831672	0.0163027	0.333444	0.436805	0.0294519	0.584314	0.00327073	0.0329282	0.103491	0.0214245
B.cells.memory	0.0265905	0	0.0323919	0.342803	0.776276	0.508798	0.89125	0.312294	0.52305	0.289152	0.232786	0.996581	0.169063	0.145642	0.036354	0.685253	0.0201107	0.253202	0.0296137	0.519036	0.41247
Plasma.cells	0.358446	0.0323919	0	0.00382494	0.357688	0.318041	0.712796	0.922253	0.501328	0.187779	0.742646	0.391539	0.804604	0.60598	0.228002	0.96629	0.35086	0.301825	0.85633	0.45185	0.144968
T.cells.CD8	0.175324	0.342803	0.00382494	0	0.017177	0.353673	0.937676	0.908877	0.855224	0.137098	0.203209	0.5131	0.741752	0.537706	0.178616	0.00664282	0.50693	0.525474	0.987254	0.30982	0.0138583
T.cells.CD4.memory.resting	0.0153285	0.776276	0.357688	0.017177	0	0.941072	0.176437	0.0657506	0.436356	0.0165548	0.0657009	0.0778601	0.851118	0.245217	0.856263	0.0125546	0.360174	0.852042	0.000907271	0.787534	0.00331148
T.cells.CD4.memory.activated	0.37829	0.508798	0.318041	0.353673	0.941072	0	0.822427	0.272779	0.755245	0.502355	0.0612559	0.114266	0.49543	0.691797	0.0357543	0.572589	0.381952	0.535626	0.103586	0.752962	0.890746
T.cells.follicular.helper	0.00590513	0.89125	0.712796	0.937676	0.176437	0.822427	0	0.00965254	0.717552	0.0628402	0.22859	0.92271	0.892264	0.689486	0.483624	0.547666	0.816801	0.115724	0.00692051	0.24867	0.428473
T.cells.regulatory..Tregs.	0.0143922	0.312294	0.922253	0.908877	0.0657506	0.272779	0.00965254	0	0.114288	0.938722	0.103582	0.14884	0.154513	0.656393	0.493713	0.886913	0.562963	0.127599	0.0584737	0.169799	0.261843
T.cells.gamma.delta	0.771548	0.52305	0.501328	0.855224	0.436356	0.755245	0.717552	0.114288	0	0.805989	0.575762	0.765893	0.186805	0.0814446	0.0973167	0.97601	0.733641	0.549325	0.795831	0.760922	0.420917
NK.cells.resting	0.188288	0.289152	0.187779	0.137098	0.0165548	0.502355	0.0628402	0.938722	0.805989	0	0.0069668	0.361541	0.744216	0.6839	0.38209	0.245367	0.192346	0.632195	0.00110835	0.0114599	0.0148578
NK.cells.activated	0.116858	0.232786	0.742646	0.203209	0.0657009	0.0612559	0.22859	0.103582	0.575762	0.0069668	0	0.240472	0.00651281	0.108076	0.970506	0.0183558	0.205851	0.0668071	0.00275617	0.37686	9.26542e-07
Monocytes	0.0831672	0.996581	0.391539	0.5131	0.0778601	0.114266	0.92271	0.14884	0.765893	0.361541	0.240472	0	0.574437	0.776067	0.163743	0.552812	0.733486	0.933749	0.397702	0.223826	0.437808
Macrophages.M0	0.0163027	0.169063	0.804604	0.741752	0.851118	0.49543	0.892264	0.154513	0.186805	0.744216	0.00651281	0.574437	0	0.551187	0.0575896	0.243106	0.627467	0.159227	0.920847	0.341696	0.0476741
Macrophages.M1	0.333444	0.145642	0.60598	0.537706	0.245217	0.691797	0.689486	0.656393	0.0814446	0.6839	0.108076	0.776067	0.551187	0	0.650594	0.78848	0.169588	0.461327	0.277673	0.354486	0.0765723
Macrophages.M2	0.436805	0.036354	0.228002	0.178616	0.856263	0.0357543	0.483624	0.493713	0.0973167	0.38209	0.970506	0.163743	0.0575896	0.650594	0	0.456953	0.605387	0.124206	0.0225386	0.47454	0.381095
Dendritic.cells.resting	0.0294519	0.685253	0.96629	0.00664282	0.0125546	0.572589	0.547666	0.886913	0.97601	0.245367	0.0183558	0.552812	0.243106	0.78848	0.456953	0	0.432441	0.648853	0.577287	0.768213	0.00814232
Dendritic.cells.activated	0.584314	0.0201107	0.35086	0.50693	0.360174	0.381952	0.816801	0.562963	0.733641	0.192346	0.205851	0.733486	0.627467	0.169588	0.605387	0.432441	0	0.396891	0.89774	0.37826	0.0869464
Mast.cells.resting	0.00327073	0.253202	0.301825	0.525474	0.852042	0.535626	0.115724	0.127599	0.549325	0.632195	0.0668071	0.933749	0.159227	0.461327	0.124206	0.648853	0.396891	0	0.00149446	0.0379438	0.459756
Mast.cells.activated	0.0329282	0.0296137	0.85633	0.987254	0.000907271	0.103586	0.00692051	0.0584737	0.795831	0.00110835	0.00275617	0.397702	0.920847	0.277673	0.0225386	0.577287	0.89774	0.00149446	0	0.13516	0.00203944
Eosinophils	0.103491	0.519036	0.45185	0.30982	0.787534	0.752962	0.24867	0.169799	0.760922	0.0114599	0.37686	0.223826	0.341696	0.354486	0.47454	0.768213	0.37826	0.0379438	0.13516	0	0.664471
Neutrophils	0.0214245	0.41247	0.144968	0.0138583	0.00331148	0.890746	0.428473	0.261843	0.420917	0.0148578	9.26542e-07	0.437808	0.0476741	0.0765723	0.381095	0.00814232	0.0869464	0.459756	0.00203944	0.664471	0
